# Supplementary material for: Identifying the Main Mosquito Species in China Based on DNA Barcoding
Source: PubMed Central journal article supplement (PMC3468562; doi:10.1371/journal.pone.0047051), 2012-10-10
Supplement: pone.0047051.s001.pdf [file pone.0047051.s001.pdf]

**Table S1.** Sequence divergence and nucleotide composition for the mosquito genera. The frequencies of nucleotides in sequence are presented as the total average values for all Condon positions and for each condon position separately with the accuracy to tenths of a percent. (\*) Figures in brackets are the number of mosquito species used to estimates of sequence divergence for the genus.

| Sequence diergence | Total     |      |      |      |      | First codon position |      |      |      |      | Second codon position |      |      |      |      | Third codon position |      |     |      |     |      |
|--------------------|-----------|------|------|------|------|----------------------|------|------|------|------|-----------------------|------|------|------|------|----------------------|------|-----|------|-----|------|
|                    | %         | %    | %    | %    | %    | %                    | %    | %    | %    | %    | %                     | %    | %    | %    | %    | %                    | %    | %   | %    | %   |      |
| Genus (*)          | %         | T    | C    | A    | G    | A+T                  | T    | C    | A    | G    | A+T                   | T    | C    | A    | G    | A+T                  | T    | C   | A    | G   | A+T  |
| Aedes (32)         | 2.3~17.7  | 38.6 | 16.5 | 29.8 | 15.1 | 68.4                 | 27.0 | 16.7 | 29.3 | 27.0 | 56.3                  | 43.7 | 26.1 | 14.1 | 16.1 | 57.8                 | 45.0 | 6.7 | 46.1 | 2.2 | 91.1 |
| Anopheles (26)     | 2.5~13.6  | 38.9 | 15.4 | 30.0 | 15.7 | 68.9                 | 27.6 | 15.3 | 27.7 | 29.5 | 55.3                  | 43.1 | 26.5 | 14.2 | 16.2 | 57.3                 | 46.0 | 4.5 | 48.0 | 1.5 | 94.0 |
| Culex (30)         | 1.8~15.0  | 40.0 | 15.6 | 29.4 | 14.9 | 69.4                 | 27.3 | 16.9 | 28.4 | 27.4 | 55.7                  | 44.1 | 25.7 | 14.1 | 16.0 | 58.2                 | 48.6 | 4.3 | 45.7 | 1.4 | 94.3 |
| Armigeres (3)      | 2.9~13.0  | 40.7 | 16.3 | 28.9 | 14.1 | 69.6                 | 28.4 | 16.3 | 29.7 | 25.6 | 58.1                  | 43.5 | 27.3 | 14.0 | 15.2 | 57.5                 | 50.4 | 5.2 | 42.9 | 1.6 | 93.3 |
| Toxorhynchites (5) | 11.1~14.3 | 40.5 | 16.3 | 29.8 | 13.4 | 70.3                 | 26.1 | 18.0 | 31.7 | 24.2 | 57.8                  | 44.6 | 24.6 | 15.5 | 15.3 | 60.1                 | 50.7 | 6.1 | 42.4 | 0.8 | 93.1 |
| Uranotaenia (2)    | 13.2      | 40.6 | 14.9 | 29.5 | 15.1 | 70.1                 | 28.2 | 15.4 | 28.7 | 27.7 | 56.9                  | 44.4 | 25.2 | 14.2 | 16.2 | 58.6                 | 49.3 | 3.9 | 45.6 | 1.2 | 94.9 |
| Tripteroides (2)   | 14.4      | 38.9 | 18.0 | 27.1 | 15.9 | 66.0                 | 25.8 | 17.4 | 29.2 | 27.5 | 55.0                  | 43.5 | 26.6 | 14.0 | 15.9 | 57.5                 | 47.3 | 9.9 | 38.4 | 4.3 | 85.7 |
| Coquillettidia     |           | 38.5 | 16.6 | 29.5 | 15.5 | 68.0                 | 27.5 | 16.9 | 28.0 | 27.5 | 55.5                  | 43.5 | 25.6 | 14.5 | 16.4 | 58.0                 | 44.4 | 7.2 | 45.9 | 2.4 | 90.3 |
| Culiseta           |           | 39.6 | 15.3 | 29.6 | 15.4 | 69.2                 | 26.3 | 17.4 | 29.6 | 26.8 | 55.9                  | 43.5 | 25.2 | 14.0 | 17.3 | 57.5                 | 49.1 | 3.3 | 45.3 | 2.3 | 94.4 |
| Heizmannia         |           | 39.3 | 17.9 | 27.4 | 15.5 | 66.7                 | 25.1 | 17.4 | 29.5 | 28.0 | 54.6                  | 43.0 | 27.5 | 13.0 | 16.4 | 56.0                 | 49.6 | 8.7 | 39.6 | 1.9 | 89.2 |
| Malaya             |           | 41.4 | 15.8 | 28.0 | 14.8 | 69.4                 | 28.5 | 15.5 | 29.5 | 26.6 | 58.0                  | 43.0 | 26.1 | 15.0 | 15.9 | 58.0                 | 52.7 | 5.8 | 39.6 | 1.9 | 92.3 |
| Mansonia           |           | 39.6 | 16.1 | 29.8 | 14.5 | 69.4                 | 27.5 | 15.9 | 29.5 | 27.1 | 57.0                  | 44.4 | 25.6 | 14.5 | 15.5 | 58.9                 | 46.9 | 6.8 | 45.4 | 1.0 | 92.3 |
| Mimomyia           |           | 39.5 | 15.9 | 30.1 | 14.5 | 69.6                 | 26.6 | 15.9 | 30.9 | 26.6 | 57.5                  | 43.0 | 26.6 | 14.0 | 16.4 | 57.0                 | 48.8 | 5.3 | 45.4 | 0.5 | 94.2 |
| Orthopodomyia      |           | 36.7 | 17.4 | 31.7 | 14.1 | 68.4                 | 23.9 | 19.4 | 30.3 | 26.4 | 54.2                  | 43.0 | 26.0 | 15.0 | 16.0 | 58.0                 | 43.3 | 7.0 | 49.8 | 0   | 93.1 |
| Topomyia           |           | 42.4 | 14.8 | 28.2 | 14.5 | 70.6                 | 31.8 | 12.6 | 28.5 | 27.1 | 60.3                  | 43.9 | 25.7 | 14.0 | 16.4 | 57.9                 | 51.6 | 6.1 | 42.3 | 0   | 93.9 |
